# Supplementary material
Source: publisher site journal article supplement (https://www.dovepress.com/article/359959)
Supplement: Supplementary file 1 [file get_supplementary_file.php]

Supplementary Table 1. Baseline laboratory and antibiotic history of COVID-19 inpatients

| **Characteristic** | **Total (n=182)** |
| --- | --- |
| **Laboratory findings, median, (IQR)** |  |
| Haemoglobin, g/dL | 12.6 (10.2 – 14.7) |
| Thrombocyte, x109/L | 235 (176 – 304) |
| Leucocyte count, x109/L | 9000 (6150 – 12682) |
| ALC | 944 (668 – 1393) |
| NLCR | 7.45 (4.37 – 12.78) |
| Procalcitonin (PCT) | 1.27 (0.67 – 4.39) |
| Days of PCT measurement | 6 (5 - 8) |
| **Antibiotics history (%)** |  |
| No | 112 (61.5) |
| Yes | 70 (38.5) |
| **Type of antibiotics empiric (%)** |  |
| Cephalosporins 3rd gen |  |
| Yes | 70 (38.5) |
| No | 112 (61.5) |
| Fluoroquinolone |  |
| Yes | 69 (37.9) |
| No | 113 (62.1) |
| Macrolide |  |
| Yes | 8 (4.4) |
| No | 174 (95.6) |
| Carbapenem |  |
| Yes | 33 (18.1) |
| No | 149 (81.9) |

COVID-19, coronavirus disease; IQR, interquartile range; PCT, procalcitonin; DM, diabetes mellitus
